# Supplementary material
Source: PubMed Central journal article supplement (PMC1361615)
Supplement: nar_34_3_806__1.pdf [file nar_34_3_806__1.pdf]

| Monomer 1          | Monomer 2                                                                                                                                                                                              | Distance, Å                                             |
|--------------------|--------------------------------------------------------------------------------------------------------------------------------------------------------------------------------------------------------|---------------------------------------------------------|
| Leu <sup>108</sup> | Arg <sup>127</sup> , Leu <sup>134</sup> , Leu <sup>137</sup>                                                                                                                                           | 3.63, 3.68, 3.70                                        |
| Tyr <sup>110</sup> | Arg <sup>127</sup>                                                                                                                                                                                     | 3.66                                                    |
| Asp <sup>118</sup> | Arg <sup>127</sup> (NH2*)                                                                                                                                                                              | 2.58                                                    |
| Ile <sup>120</sup> | Ile <sup>120</sup> , Ile <sup>123</sup> , Ser <sup>124</sup> , Arg <sup>127</sup>                                                                                                                      | 3.99, 3.79, 3.56, 3.57                                  |
| Ile <sup>123</sup> | Ile <sup>120</sup>                                                                                                                                                                                     | 3.79                                                    |
| Ser <sup>124</sup> | Ile <sup>120</sup> , Ser <sup>124</sup> (OG*)                                                                                                                                                          | 3.56, 2.62                                              |
| Arg <sup>127</sup> | Leu <sup>108</sup> , Tyr <sup>110</sup> , Asp <sup>118</sup> (OD2*), Ile <sup>120</sup>                                                                                                                | 3.63, 3.66, 2.58, 3.57                                  |
| Leu <sup>134</sup> | Leu <sup>108</sup>                                                                                                                                                                                     | 3.68                                                    |
| Asn <sup>136</sup> | Phe <sup>151</sup> , Phe <sup>152</sup>                                                                                                                                                                | 3.23, 3.35                                              |
| Leu <sup>137</sup> | Leu <sup>108</sup> , His <sup>156</sup> (NE2*)                                                                                                                                                         | 3.70, 2.88                                              |
| Ile <sup>139</sup> | Ile <sup>139</sup> , His <sup>156</sup>                                                                                                                                                                | 3.78, 3.63                                              |
| Asn <sup>141</sup> | Val <sup>207</sup>                                                                                                                                                                                     | 3.63                                                    |
| Ala <sup>148</sup> | Leu <sup>172</sup> , Asn <sup>203</sup> (ND2*)                                                                                                                                                         | 3.16, 2.82                                              |
| Gln <sup>149</sup> | Phe <sup>170</sup> , Leu <sup>172</sup> , Arg <sup>176</sup> (NH2*)                                                                                                                                    | 3.57, 3.62, 3.02                                        |
| Arg <sup>150</sup> | Trp <sup>161</sup> , Lys <sup>166</sup> , Tyr <sup>168</sup> (OH*), Phe <sup>170</sup>                                                                                                                 | 3.86, 3.44, 2.66, 3.65                                  |
| Phe <sup>151</sup> | Asn <sup>136</sup> , Trp <sup>161</sup> , Phe <sup>170</sup> ,<br>Asn <sup>203</sup> (ND2*)                                                                                                            | 3.23, 3.85, 3.25, 2.98                                  |
| Phe <sup>152</sup> | Asn <sup>136</sup> (OD1*), Trp <sup>161</sup> , Phe <sup>170</sup> ,<br>Asn <sup>203</sup> , Pro <sup>204</sup> , Thr <sup>205</sup> , Asn <sup>206</sup> ,<br>Trp <sup>208</sup> , Ala <sup>238</sup> | 2.88, 3.99, 3.80, 3.46,<br>3.70, 3.40, 3.65, 3.70, 3.92 |
| Ala <sup>153</sup> | Asn <sup>203</sup> (OD1*), Thr <sup>205</sup> , Asn <sup>206</sup> (N*)                                                                                                                                | 3.04, 3.17, 2.91                                        |
| Asn <sup>154</sup> | Asn <sup>206</sup> (ND2*)                                                                                                                                                                              | 2.93                                                    |
| Arg <sup>155</sup> | Thr <sup>205</sup> , Asn <sup>206</sup> (OD1*), Val <sup>207</sup>                                                                                                                                     | 3.69, 2.91, 3.92                                        |
| His <sup>156</sup> | Leu <sup>137</sup> (O*), Ile <sup>139</sup> , Asn <sup>156</sup> , Val <sup>207</sup>                                                                                                                  | 2.88, 3.63, 3.18, 3.74                                  |
| Trp <sup>161</sup> | Arg <sup>150</sup> , Phe <sup>151</sup> , Phe <sup>152</sup>                                                                                                                                           | 3.86, 3.85, 3.99                                        |
| Lys <sup>166</sup> | Arg <sup>150</sup>                                                                                                                                                                                     | 3.44                                                    |
| Tyr <sup>168</sup> | Arg <sup>150</sup> (O*)                                                                                                                                                                                | 2.66                                                    |
| Phe <sup>170</sup> | Gln <sup>149</sup> , Arg <sup>150</sup> , Phe <sup>151</sup> , Phe <sup>152</sup>                                                                                                                      | 3.57, 3.42, 3.24, 3.80                                  |
| Leu <sup>172</sup> | Ala <sup>148</sup> , Gln <sup>149</sup>                                                                                                                                                                | 3.16, 3.62                                              |
| Arg <sup>176</sup> | Gln <sup>149</sup> (OE1*)                                                                                                                                                                              | 3.02                                                    |
| Asn <sup>203</sup> | Ala <sup>148</sup> (O*), Phe <sup>151</sup> (O*), Phe <sup>152</sup> ,<br>Ala <sup>153</sup> (N*)                                                                                                      | 2.82, 2.98, 3.46, 3.04                                  |
| Pro <sup>204</sup> | Phe <sup>152</sup>                                                                                                                                                                                     | 3.70                                                    |
| Thr <sup>205</sup> | Phe <sup>152</sup> , Ala <sup>153</sup> , Arg <sup>155</sup>                                                                                                                                           | 3.40, 3.17, 3.69                                        |
| Asn <sup>206</sup> | Phe <sup>152</sup> , Ala <sup>153</sup> (O*), Asn <sup>154</sup> (OD1*),<br>Arg <sup>155</sup> (N*), His <sup>156</sup>                                                                                | 3.64, 2.91, 2.93, 2.91, 3.18                            |
| Val <sup>207</sup> | Asn <sup>141</sup> , Arg <sup>155</sup> , His <sup>156</sup>                                                                                                                                           | 3.63, 3.92, 3.74                                        |
| Trp <sup>208</sup> | Phe <sup>152</sup>                                                                                                                                                                                     | 3.70                                                    |
| Ala <sup>238</sup> | Phe <sup>152</sup>                                                                                                                                                                                     | 3.92                                                    |

Supplemental Table 1: Dimer Interface Contacts in M.RsrI. Contacts within 4.0 Å were determined using CCP4 (1) and O (2). Interactions including hydrogen bonds within 3.2 Å and 100° are marked with a \*.

---

**References:**

1. COLLABORATIVE COMPUTATIONAL PROJECT, NUMBER 4. (1994) The CCP4 Suite: Programs for Protein Crystallography. *Acta Cryst.*, **D50**, 760-763.
2. Jones, T.A., Cowan, S., Zou, J.-Y. & Kjeldgaard, M. (1991). Improved Methods for Building Protein Models in Electron Density Maps and the Location of Errors in these Models. *Acta Cryst.* **A47**, pp. 110—119.
